# Supplementary material for: Robot-Assisted Orbital Fat Decompression Surgery: First in Human
Source: PubMed Central journal article supplement (PMC9100477; doi:10.1167/tvst.11.5.8), 2022-05-10
Supplement: tvst-11-5-8_s001.pdf [file tvst-11-5-8_s001.pdf]

The following questions deal specifically with your thyroid eye disease.

Please focus on the past week while answering these questions

During the past week, to what extent were you limited in carrying out the following activities, because of your thyroid eye disease?

Tick the box that matches your answer. The boxes correspond with the answers above them.

Please tick only one box for each question.

|                                                                      | Yes,<br>seriously<br>limited | Yes,<br>a little<br>limited | No<br>not at all<br>limited |
|----------------------------------------------------------------------|------------------------------|-----------------------------|-----------------------------|
| 1 Bicycling [never learned to ride a bike <input type="checkbox"/> ] | <input type="checkbox"/>     | <input type="checkbox"/>    | <input type="checkbox"/>    |
| 2 Driving [no driver's licence <input type="checkbox"/> ]            | <input type="checkbox"/>     | <input type="checkbox"/>    | <input type="checkbox"/>    |
| 3 Moving around the house                                            | <input type="checkbox"/>     | <input type="checkbox"/>    | <input type="checkbox"/>    |
| 4 Walking outdoors                                                   | <input type="checkbox"/>     | <input type="checkbox"/>    | <input type="checkbox"/>    |
| 5 Reading                                                            | <input type="checkbox"/>     | <input type="checkbox"/>    | <input type="checkbox"/>    |
| 6 Watching TV                                                        | <input type="checkbox"/>     | <input type="checkbox"/>    | <input type="checkbox"/>    |
| 7 Hobby or pastime,<br>i.e.....                                      | <input type="checkbox"/>     | <input type="checkbox"/>    | <input type="checkbox"/>    |

|                                                                                                                         | Yes,<br>severely<br>hindered | Yes<br>a little<br>hindered | No<br>not at all<br>hindered |
|-------------------------------------------------------------------------------------------------------------------------|------------------------------|-----------------------------|------------------------------|
| 8 During the past week, did you feel hindered from something that you wanted to do because of your thyroid eye disease? | <input type="checkbox"/>     | <input type="checkbox"/>    | <input type="checkbox"/>     |

The following questions deal with your thyroid eye disease in general

|                                                                                              | Yes, very<br>much so     | Yes, a little            | No, not at all           |
|----------------------------------------------------------------------------------------------|--------------------------|--------------------------|--------------------------|
| 9 Do you feel that your appearance has changed because of your thyroid eye disease?          | <input type="checkbox"/> | <input type="checkbox"/> | <input type="checkbox"/> |
| 10 Do you feel that you are stared at in the streets because of your thyroid eye disease?    | <input type="checkbox"/> | <input type="checkbox"/> | <input type="checkbox"/> |
| 11 Do you feel that people react unpleasantly because of your thyroid eye disease?           | <input type="checkbox"/> | <input type="checkbox"/> | <input type="checkbox"/> |
| 12 Do you feel that your thyroid eye disease has an influence on your self-confidence?       | <input type="checkbox"/> | <input type="checkbox"/> | <input type="checkbox"/> |
| 13 Do you feel socially isolated because of your thyroid eye disease?                        | <input type="checkbox"/> | <input type="checkbox"/> | <input type="checkbox"/> |
| 14 Do you feel that your thyroid eye disease has an influence on making friends?             | <input type="checkbox"/> | <input type="checkbox"/> | <input type="checkbox"/> |
| 15 Do you feel that you appear less often on photos than before you had thyroid eye disease? | <input type="checkbox"/> | <input type="checkbox"/> | <input type="checkbox"/> |
| 16 Do you try to mask changes in appearance caused by your thyroid eye disease?              | <input type="checkbox"/> | <input type="checkbox"/> | <input type="checkbox"/> |
