# Supplementary material for: Robot-Assisted Orbital Fat Decompression Surgery: First in Human
Source: PubMed Central journal article supplement (PMC9100477; doi:10.1167/tvst.11.5.8), 2022-05-10

# Pain Assessment Scale

Pain intensity ( Visual analogue scoring ):

0 — 1 — 2 — 3 — 4 — 5 — 6 — 7 — 8 — 9 — 10

0 No pain  
1-3 Mild pain (Sleep is not affected)  
4-6 Moderate pain (Sleep is affected)  
7-10 Serious pain (Sleep is severely affected)

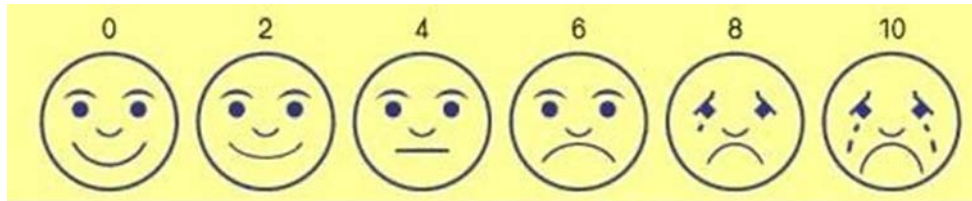

Supplement: tvst-11-5-8_s002.pdf [file tvst-11-5-8_s002.pdf]
